# Supplementary material for: Pulmonary Outcomes Associated with Long-Term Azithromycin Therapy in Cystic Fibrosis
Source: PubMed Central journal article supplement — Am J Respir Crit Care Med. 2020 Feb 15;201(4):430–7. doi: 10.1164/rccm.201906-1206OC (PMC7049934; doi:10.1164/rccm.201906-1206oc), 2020-02-15
Supplement: rccm.201906-1206OC_nichols_data_supplement.pdf [file rccm.201906-1206OC_nichols_data_supplement.pdf]

Pulmonary Outcomes Associated with Long-Term Azithromycin Therapy in Cystic Fibrosis

Dave P Nichols MD

Katherine Odem-Davis PhD

Jonathan D Cogen MD MPH

Christopher H Goss MD MS

Clement L Ren MD MBA

Michelle Skalland MS

Ranjani Somayaji MD MPH

Sonya L Heltshe PhD

**ONLINE DATA SUPPLEMENT**

## Supplemental Methods

Consistent with published guidelines, pre-specified variables were selected by the investigators for propensity weighting based on the potential to impact the outcomes of interest. This was done prior to analyses and no variables were removed based on the results. Propensity scores were computed by logistic regression with 14 pre-specified variables: age group (6-11, 12-17, 18-23, 24-29,30-35,36+), maximum forced expiratory volume in one second percent predicted by GLI reference equations (FEV1pp) in the past 6 months, gender, mutation class (1-3,4/5,-), enzyme use, non-white (any non-white race and/or Hispanic ethnicity), BMI (raw over 18, percentile under 18), CF related diabetes (CFRD), liver disease, number of pulmonary exacerbations in prior 12 months (0, 1-2, 3+), calendar year at baseline, dornase alfa use, hypertonic saline use, and insurance category (Private, Medicare, Medicaid, No Insurance). An indicator of any CFTR modulator use during follow-up was added to the PS model to account for imbalance in this time-varying confounder(1).

FEV1pp matching was exact on age group and categorical maximum FEV1pp in the past 6 months (<60%, 60% to <80%, 80% to <90%, 90% to <100%, ≥100%). Caliper was set to 0.1 PS standard deviations (SD), to more closely match on variables imbalanced initially after using the default settings. This setting reduced the number of matched pairs since exposed subjects with greater than 0.1 SD difference in PS relative to any control were excluded from analysis. Marginal structural models were considered but were not used due to the nature of the exposure, which is defined over the entire period rather than treated as time varying.

In mixed effects models with random slopes, values missing after loss to follow-up were modeled by the assumption of a continued trend at the subject level. Missing values were otherwise treated as “missing at random”.

983 people with any non-tuberculous mycobacteria positive cultures were excluded. This exclusion criterion was based on culture history alone and not on a need for antibiotic treatment of this infection. Consensus treatment guidelines recommend discontinuing azithromycin in people with NTM (+) cultures unless it is included as part of a multi-drug treatment regimen. Such patients are relatively unlikely to be using chronic AZM as a CF maintenance therapy, the primary interest of our analyses. When AZM is used in this population, it is most likely to be in combination with other antibiotics to treat NTM-related pulmonary disease. For these reasons, this population presents a higher risk of misclassification and confounding that may be challenging to address in the data available, and they were excluded from our analyses.

## Supplemental Tables and Figures

Table E1. Cohort 1 &2 demographics: incident chronic use of azithromycin by PA status, unmatched

|                                           | PA Positive        |                |        | PA Negative         |                |        |
|-------------------------------------------|--------------------|----------------|--------|---------------------|----------------|--------|
|                                           | Control<br>(n=834) | AZM<br>(n=640) | p      | Control<br>(n=2743) | AZM<br>(n=498) | p      |
| Best 6mo FEV <sub>1</sub> %,<br>mean (sd) | 81.1 (21.9)        | 81.7 (21.4)    | 0.615  | 94.7 (17.7)         | 90.0 (18.7)    | <0.001 |
| Baseline age, mean<br>(sd)                | 20.3 (8.5)         | 18.5 (7.8)     | <0.001 | 13.8 (6.1)          | 13.8 (5.4)     | 0.933  |
| Any Lumacaftor/<br>Ivacaftor Use          | 59 (7.1)           | 34 (5.3)       | 0.204  | 159 (5.8)           | 24 (4.8)       | 0.445  |
| PE prior 12 months                        |                    |                | 0.173  |                     |                | <0.001 |
| 0                                         | 479 (57.4)         | 339 (53.0)     |        | 2251 (82.1)         | 311 (62.4)     |        |
| 1-2                                       | 307 (36.8)         | 254 (39.7)     |        | 439 (16.0)          | 163 (32.7)     |        |
| 3+                                        | 48 (5.8)           | 47 (7.3)       |        | 53 (1.9)            | 24 (4.8)       |        |
| Male                                      | 413 (49.5)         | 306 (47.8)     | 0.55   | 1470 (53.6)         | 227 (45.6)     | 0.001  |
| Non-white and/or<br>Hispanic              | 128 (15.3)         | 90 (14.1)      | 0.539  | 427 (15.6)          | 70 (14.1)      | 0.428  |
| Mutation class                            |                    |                | 0.064  |                     |                | <0.001 |
| 1-3                                       | 677 (81.2)         | 549 (85.8)     |        | 1814 (66.1)         | 396 (79.5)     |        |
| 4-5                                       | 38 (4.6)           | 22 (3.4)       |        | 346 (12.6)          | 27 (5.4)       |        |
| Other                                     | 119 (14.3)         | 69 (10.8)      |        | 583 (21.3)          | 75 (15.1)      |        |
| Baseline year in<br>2011-2014*            | 443 (53.1)         | 270 (42.2)     | <0.001 | 1676 (61.1)         | 240 (48.2)     | <0.001 |
| Dornase alfa                              | 643 (81.3)         | 552 (88.9)     | <0.001 | 2023 (78.5)         | 428 (88.4)     | <0.001 |
| Pancreatic enzymes                        | 698 (83.7)         | 537 (83.9)     | 0.969  | 2096 (76.4)         | 419 (84.1)     | <0.001 |
| CF liver disease                          | 83 (10.0)          | 53 (8.3)       | 0.314  | 172 (6.3)           | 31 (6.2)       | 1.000  |
| CF related diabetes                       | 160 (19.2)         | 123 (19.2)     | 1.000  | 161 (5.9)           | 51 (10.2)      | <0.001 |
| Hypertonic saline                         | 358 (45.3)         | 306 (49.3)     | 0.148  | 1146 (44.5)         | 269 (55.6)     | <0.001 |
| Insurance                                 |                    |                | 0.003  |                     |                | 0.098  |
| Private                                   | 517 (62.1)         | 413 (64.6)     |        | 1715 (62.8)         | 334 (67.5)     |        |
| Medicare                                  | 55 (6.6)           | 19 (3.0)       |        | 55 (2.0)            | 4 (0.8)        |        |
| Medicaid                                  | 214 (25.7)         | 184 (28.8)     |        | 807 (29.5)          | 131 (26.5)     |        |
| No insurance                              | 47 (5.6)           | 23 (3.6)       |        | 156 (5.7)           | 26 (5.3)       |        |
| BMI (<20 y/o),<br>mean (sd)               | 46.3 (27.6)        | 47.0 (27.9)    | 0.730  | 51.0 (27.4)         | 47.7 (26.2)    | 0.020  |
| BMI (≥20 y/o),<br>mean (sd)               | 22.3 (3.6)         | 22.2 (3.6)     | 0.704  | 23.8 (4.8)          | 22.7 (4.1)     | 0.121  |

\*\* Reference group: baseline year 2007-2010

P-values reflect chi-square hypothesis test for categorical or t-test for continuous variables.

Table E2. Cohort 3 & 4 demographics: chronic inhaled antipseudomonal TOB/AZLI, unmatched ( $\geq 1$  year follow-up)

|                                        | INHALED TOB         |                      |        | INHALED AZLI       |                      |        |
|----------------------------------------|---------------------|----------------------|--------|--------------------|----------------------|--------|
|                                        | Low AZM<br>(n=3122) | High AZM<br>(n=4868) | p      | Low AZM<br>(n=669) | High AZM<br>(n=1580) | p      |
| Follow-up years, mean (sd)             | 2.46 (1.53)         | 2.68 (1.60)          |        | 2.06 (1.22)        | 2.29 (1.26)          |        |
| Best 6mo FEV <sub>1</sub> %, mean (sd) | 85.8 (21.8)         | 78.1 (23.2)          | <0.001 | 77.2 (24.1)        | 71.8 (23.9)          | <0.001 |
| Baseline age, mean (sd)                | 17.1 (11.0)         | 20.7 (11.2)          | <0.001 | 23.6 (14.0)        | 25.9 (13.6)          | <0.001 |
| Any Lumacaftor/<br>Ivacaftor Use       | 366 (11.7)          | 691 (14.2)           | <0.001 | 92 (13.8)          | 260 (16.5)           | 0.248  |
| PE prior 12 months                     |                     |                      | <0.001 |                    |                      | 0.021  |
| 0                                      | 1936 (62.0)         | 2620 (53.8)          |        | 358 (53.5)         | 771 (48.8)           |        |
| 1-2                                    | 879 (28.2)          | 1632 (33.5)          |        | 238 (35.6)         | 619 (39.2)           |        |
| 3+                                     | 133 (4.3)           | 356 (7.3)            |        | 44 (6.6)           | 143 (9.1)            |        |
| Male                                   | 1621 (51.9)         | 2568 (52.8)          | 0.482  | 302 (45.1)         | 679 (43.0)           | 0.368  |
| Non-white or<br>Hispanic               | 600 (19.2)          | 812 (16.7)           | 0.004  | 96 (14.3)          | 185 (11.7)           | 0.097  |
| Mutation class                         |                     |                      | <0.001 |                    |                      | 0.899  |
| 1-3                                    | 2397 (76.8)         | 3921 (80.5)          |        | 523 (78.2)         | 1231 (77.9)          |        |
| 4-5                                    | 157 (5.0)           | 242 (5.0)            |        | 46 (6.9)           | 103 (6.5)            |        |
| Other                                  | 568 (18.2)          | 705 (14.5)           |        | 100 (14.9)         | 246 (15.6)           |        |
| Baseline year in<br>2013-2016*         | 1392 (44.6)         | 1622 (33.3)          | <0.001 | 354 (52.9)         | 743 (47.0)           | 0.012  |
| Dornase alfa                           | 2605 (83.4)         | 4226 (86.8)          | <0.001 | 554 (82.8)         | 1353 (85.6)          | 0.101  |
| Pancreatic enzymes                     | 2705 (86.6)         | 4207 (86.4)          | 0.803  | 578 (86.4)         | 1397 (88.4)          | 0.205  |
| CF liver disease                       | 237 (7.6)           | 366 (7.5)            | 0.939  | 64 (9.6)           | 123 (7.8)            | 0.188  |
| CF related diabetes                    | 355 (11.4)          | 785 (16.1)           | <0.001 | 135 (20.2)         | 368 (23.3)           | 0.118  |
| Hypertonic saline                      | 1481 (47.4)         | 2684 (55.1)          | <0.001 | 384 (57.4)         | 982 (62.2)           | 0.039  |
| Insurance                              |                     |                      | <0.001 |                    |                      | 0.033  |
| Private                                | 1642 (52.6)         | 2795 (57.4)          |        | 412 (61.6)         | 1028 (65.1)          |        |
| Medicare                               | 99 (3.2)            | 235 (4.8)            |        | 31 (4.6)           | 106 (6.7)            |        |
| Medicaid                               | 998 (32.0)          | 1237 (25.4)          |        | 140 (20.9)         | 281 (17.8)           |        |
| No insurance                           | 167 (5.3)           | 269 (5.5)            |        | 48 (7.2)           | 104 (6.6)            |        |
| BMI (< 20 y/o), mean (sd)              | 48.9 (27.7)         | 47.7 (27.3)          | 0.126  | 49.0 (27.3)        | 47.8 (26.4)          | 0.496  |
| BMI ( $\geq 20$ y/o), mean (sd)        | 22.7 (4.0)          | 22.4 (3.7)           | 0.056  | 23.1 (3.9)         | 23.0 (3.9)           | 0.834  |

\* Reference group: baseline year 2010-2012

P-values reflect chi-square hypothesis test for categorical or t-test for continuous variables.

Table E3. FEV1 Rate of Change outcomes among cohorts 1 & 2: incident chronic use of azithromycin

| <b>Propensity Matched Cohort</b>                         | <b>PA Positive<br/>(n=752)</b>  | <b>PA Negative<br/>(n=814)</b>  |
|----------------------------------------------------------|---------------------------------|---------------------------------|
| <b>FEV1 PP Slope/year (all data)</b>                     |                                 |                                 |
| Control                                                  | -2.41                           | -1.70                           |
| Chronic AZM                                              | -1.53                           | -1.46                           |
| Chronic AZM – Controls                                   | <b>0.88</b>                     | <b>0.24</b>                     |
| Standard Error for Chronic AZM – Controls                | 0.30                            | 0.28                            |
| p-value                                                  | 0.003                           | 0.398                           |
| <b>FEV1 PP Slope/year (yearly maximum)</b>               |                                 |                                 |
| Control                                                  | -2.25                           | -1.47                           |
| Chronic AZM                                              | -1.44                           | -1.24                           |
| Chronic AZM – Controls                                   | <b>0.81</b>                     | <b>0.23</b>                     |
| Standard Error for Chronic AZM – Controls                | 0.24                            | 0.24                            |
| p-value                                                  | 0.001                           | 0.345                           |
| <b>Yearly FEV1 PP Estimates (yearly maximum)</b>         |                                 |                                 |
| Year 0 Controls (reference)                              | 85                              | 96                              |
| Year 0 Chronic AZM - Controls (p-value)                  | 0.56 (0.72)                     | -0.78 (0.52)                    |
| Year 1 Chronic AZM - Controls (p-value*)                 | 0.65 (0.87)                     | 0.06 (0.13)                     |
| Year 2 Chronic AZM - Controls (p-value*)                 | 1.90 (0.036)                    | -0.15 (0.32)                    |
| Year 3 Chronic AZM - Controls (p-value*)                 | 2.84 (0.002)                    | 0.05 (0.27)                     |
| * Reference for p-value is Year 0 Chronic AZM – Controls |                                 |                                 |
| <b>Un-Matched Cohort</b>                                 | <b>PA Positive<br/>(n=1463)</b> | <b>PA Negative<br/>(n=3208)</b> |
| <b>FEV1 PP Slope/year (all data)</b>                     |                                 |                                 |
| Control                                                  | -2.15                           | -1.54                           |
| Chronic AZM                                              | -1.53                           | -1.27                           |
| Chronic AZM – Controls                                   | 0.62                            | 0.27                            |
| Standard Error for Chronic AZM – Controls                | 0.21                            | 0.19                            |
| p-value                                                  | 0.003                           | 0.160                           |
| <b>FEV1 PP Slope/year (yearly maximum)</b>               |                                 |                                 |
| Control                                                  | -2.14                           | -1.30                           |
| Chronic AZM                                              | -1.33                           | -1.35                           |
| Chronic AZM – Controls                                   | 0.81                            | -0.049                          |
| Standard Error for Chronic AZM – Controls                | 0.19                            | 0.17                            |
| p-value                                                  | <0.001                          | 0.773                           |

**Yearly FEV1 PP Estimates (yearly maximum)**

|                                          |               |                |
|------------------------------------------|---------------|----------------|
| Year 0 Controls (reference)              | 83            | 97             |
| Year 0 Chronic AZM - Controls (p-value)  | 0.44 (0.706)  | -4.99 (<0.001) |
| Year 1 Chronic AZM - Controls (p-value*) | 1.70 (0.003)  | -4.25 (0.063)  |
| Year 2 Chronic AZM - Controls (p-value*) | 2.21 (<0.001) | -4.78 (0.654)  |
| Year 3 Chronic AZM - Controls (p-value*) | 2.98 (<0.001) | -4.97 (0.974)  |

---

\* Reference for p-value is Year 0 Chronic AZM – Controls

Table E4. FEV1 rate of change and pulmonary exacerbation (PEX) outcomes among cohorts 3 & 4: chronic inhaled antipseudomonal TOB/AZLI who were PA(+), by follow-up time.

|                                                       | <b>TOB</b>   | <b>AZLI</b>  | <b>TOB</b>   | <b>AZLI</b>  |
|-------------------------------------------------------|--------------|--------------|--------------|--------------|
| Follow-up time                                        | 1+ Years     | 1+ Years     | 2+ Years     | 2+ Years     |
| N                                                     | 1496         | 466          | 768          | 158          |
| <b>FEV1 PP Slope/year (all data)</b>                  |              |              |              |              |
| Low AZM                                               | -1.84        | -2.51        | -1.57        | -1.73        |
| High AZM                                              | -1.72        | -1.73        | -1.70        | -1.52        |
| High AZM – Low AZM                                    | 0.12         | 0.78         | -0.13        | 0.21         |
| Std Error for High AZM – Low AZM                      | 0.24         | 0.40         | 0.27         | 0.48         |
| p-value                                               | 0.608        | 0.050        | 0.635        | 0.663        |
| <b>FEV1 PP Slope/year (yearly maximum)</b>            |              |              |              |              |
| Low AZM                                               | -2.77        | -3.18        | -2.31        | -1.73        |
| High AZM                                              | -2.64        | -2.81        | -2.53        | -1.79        |
| High AZM – Low AZM                                    | 0.14         | 0.36         | -0.22        | -0.07        |
| Std Error for High AZM –Low AZM                       | 0.25         | 0.62         | 0.29         | 0.58         |
| p-value                                               | 0.572        | 0.557        | 0.448        | 0.905        |
| <b>IV Antibiotics Treated Pulmonary Exacerbations</b> |              |              |              |              |
| Low AZM mean PEX rate in 12 months                    | 0.72         | 0.88         | 0.57         | 0.73         |
| High AZM mean PEX rate in 12 months                   | 0.73         | 0.89         | 0.63         | 0.85         |
| Rate Ratio (RR)                                       | 1.01         | 1.01         | 1.10         | 1.16         |
| RR 95% CI                                             | (0.88, 1.18) | (0.79, 1.29) | (0.87, 1.38) | (0.74, 1.81) |
| p-value                                               | 0.843        | 0.939        | 0.417        | 0.531        |

Figure E1. Qualified Windows for cohort inclusion. Each square represents an age-quarter of clinic visits, registry “encounters” observed at the clinic. + indicates treatment for the corresponding therapy was indicated (or PA was detected) for at least one encounter in the quarter. (-) indicates that all encounters in the quarter were negative for the treatment (or PA). ? indicates that no encounters were observed in the quarter. For chronic inhaled antibiotics, E1b, cohorts 3 & 4 qualified windows were based on at least 2 quarters per year of tobramycin (TOB) or aztreonam lysine (AZLI), and no quarters of the other inhaled antibiotic, and either  $\geq 75\%$  or  $\leq 25\%$  azithromycin (AZM). Current illustration is for TOB cohort.

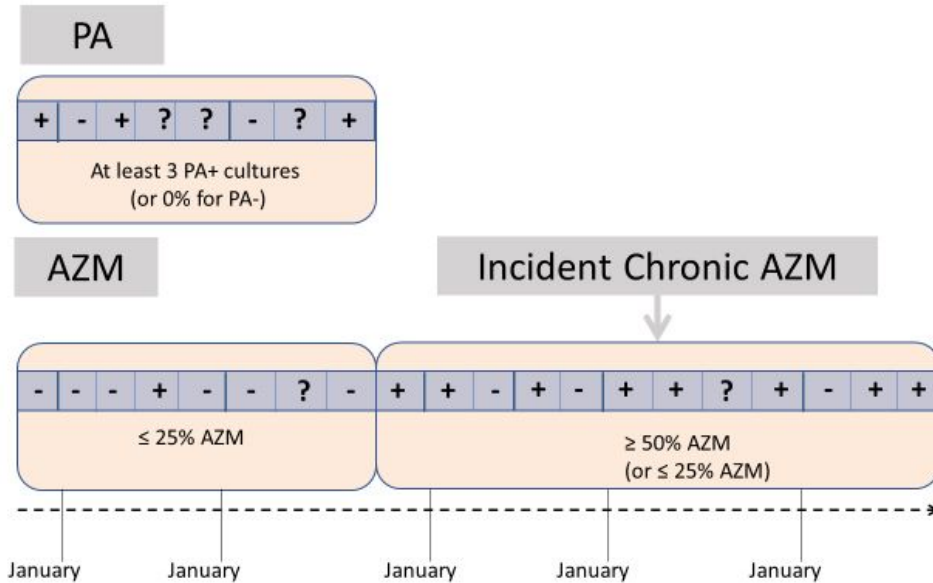

E1b

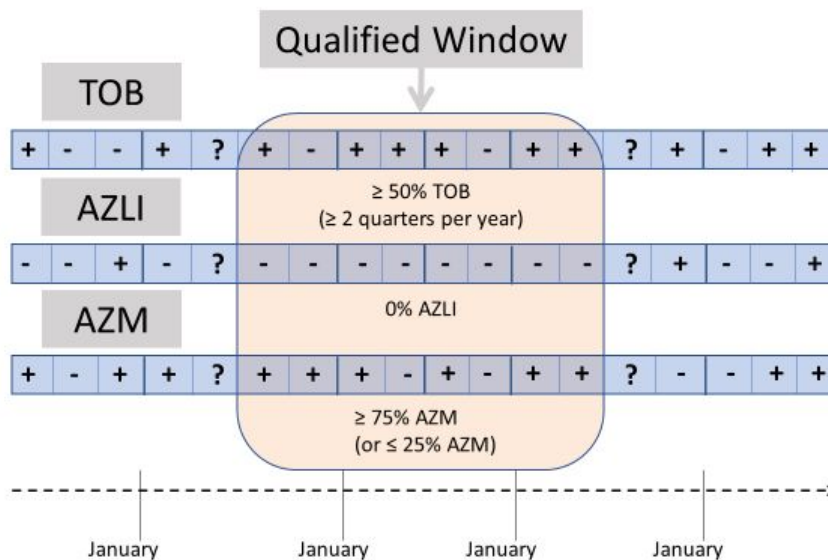



Figure E2. Subject inclusion/exclusion diagrams. E2a: cohorts 1 & 2 incident chronic AZM by PA status. E2b: cohorts 3 & 4 chronic inhaled TOB/AZLI.

E2a.

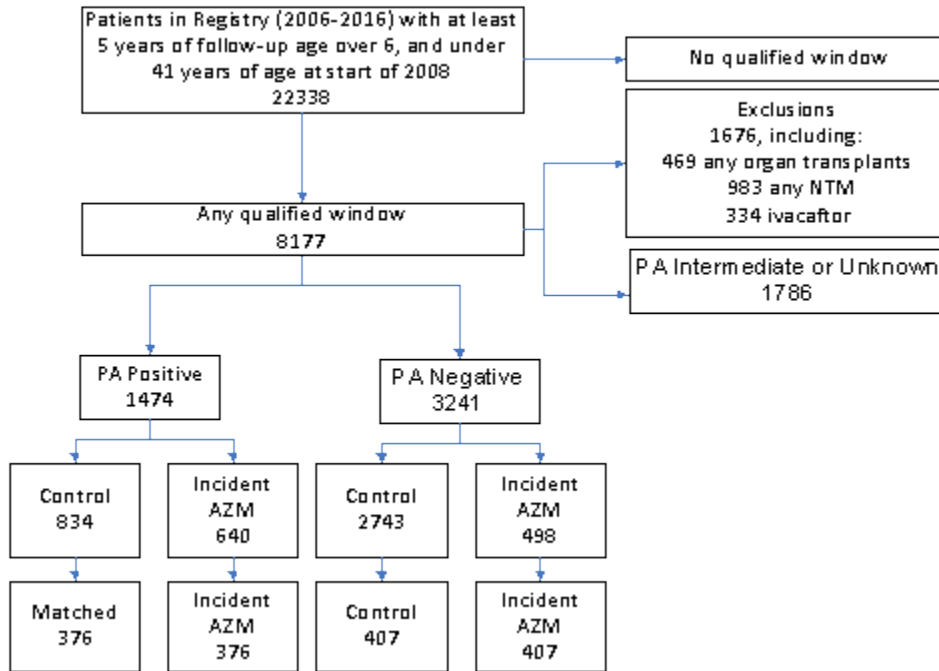

E2b.

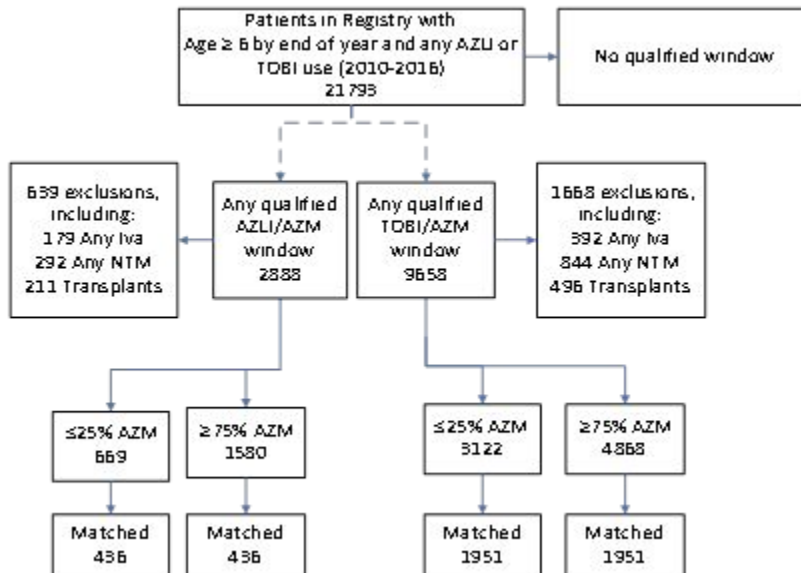

Figure E3. Propensity score distributions are summarized by counts of subjects (vertical axis) with estimated probability of AZM use from logistic regression among all subjects eligible in each cohort by AZM group (horizontal axis). The overlapping regions indicate candidates for matching due to similar “propensity” characteristics among subjects who fall in each group. Note that fewer subjects are eligible to match at the extremes for most cohorts. E3a: for cohorts 1& 2 incident chronic AZM by PA status. E3b: cohorts 3 &4 chronic inhaled TOB/AZLI.

E3a.

PA Positive

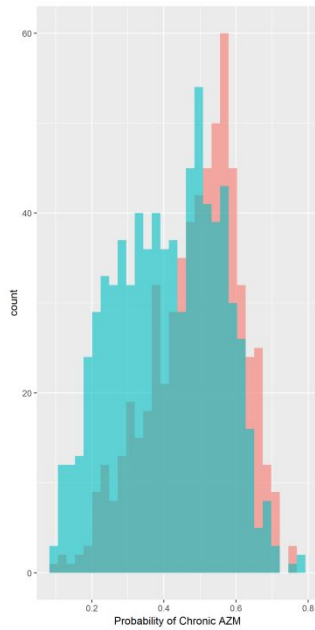

PA Negative

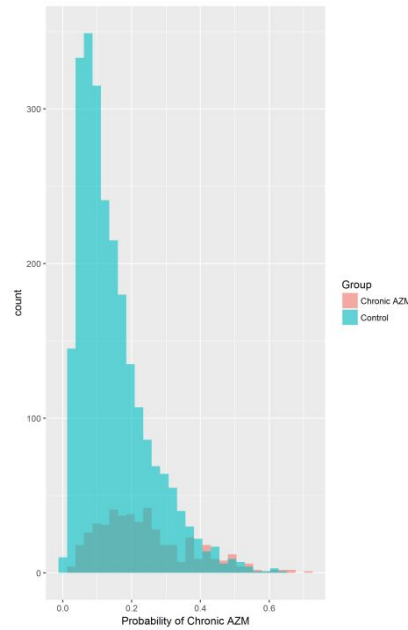

E3b.

TOB (all with 1+ years follow-up)

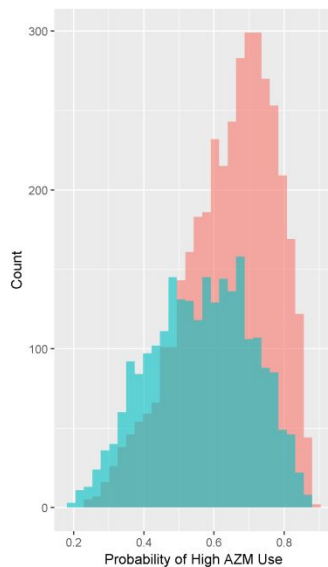

AZLI (all with 1+ years follow-up)

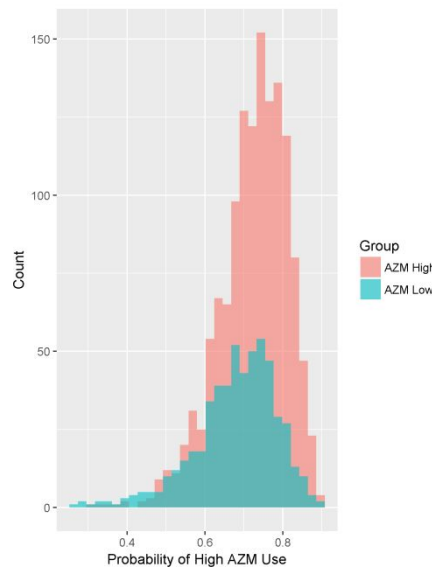

## References

1. Lederer DJ, Bell SC, Branson RD, Chalmers JD, Marshall R, Maslove DM, Ost DE, Punjabi NM, Schatz M, Smyth AR, Stewart PW, Suissa S, Adjei AA, Akdis CA, Azoulay E, Bakker J, Ballas ZK, Bardin PG, Barreiro E, Bellomo R, Bernstein JA, Brusasco V, Buchman TG, Chokroverty S, Collop NA, Crapo JD, Fitzgerald DA, Hale L, Hart N, Herth FJ, Iwashyna TJ, Jenkins G, Kolb M, Marks GB, Mazzone P, Moorman JR, Murphy TM, Noah TL, Reynolds P, Riemann D, Russell RE, Sheikh A, Sotgiu G, Swenson ER, Szczesniak R, Szymusiak R, Teboul JL, Vincent JL. Control of Confounding and Reporting of Results in Causal Inference Studies: Guidance for Authors from Editors of Respiratory, Sleep, and Critical Care Journals. *Annals of the American Thoracic Society* 2018.
